# Supplementary material for: Human Immune System Development and Rejection of Human Islet Allografts in Spontaneously Diabetic NOD-Rag1null IL2rγnull Ins2Akita Mice
Source: PubMed Central journal article supplement — Diabetes. 2010 Jun 22;59(9):2265–70. doi: 10.2337/db10-0323 (PMC2927949; doi:10.2337/db10-0323), 2010-06-22
Supplement: supp_db10-0323_db100323Onlineappendix.pdf [file supp_db10-0323_db100323Onlineappendix.pdf]

**Supplemental Table 1: Flow Cytometric Analysis of Splenocytes From Non-engrafted NRG-Akita and NOD-*Rag1*<sup>null</sup> *Ins2*<sup>+Akita</sup> Mice**

| Surface Marker                                   | NRG (n=4) | NRG-Akita (n=4) |
|--------------------------------------------------|-----------|-----------------|
| <b>Total Splenocyte Number (x10<sup>6</sup>)</b> | 2.6±0.4   | 2.7±0.4         |
| <b>Murine Immune Cell Subsets (%)</b>            |           |                 |
| CD3 <sup>+</sup> /CD4 <sup>+</sup>               | 0.7±0.6   | 0.2±0.1         |
| CD3 <sup>+</sup> /CD8 <sup>+</sup>               | 0.3±0.3   | 0.1±0.0         |
| B220 <sup>+</sup> /IgK <sup>+</sup>              | 0.04±0.03 | 0.2±0.13        |
| B220 <sup>+</sup> /IgK <sup>-</sup>              | 3.2±0.1   | 3.1±0.4         |
| GR-1 <sup>+</sup> /Mac-1 <sup>-</sup>            | 23.3±1.1  | 21.2±1.8        |
| GR-1 <sup>-</sup> /Mac-1 <sup>+</sup>            | 26.0±1.9  | 32.6±3.8        |
| Ter 119 <sup>+</sup>                             | 46.1±1.6  | 45.0±3.3        |
| DX5 <sup>+</sup> /CD122 <sup>+</sup>             | 2.4±0.4   | 2.7±0.3         |
| LGL <sup>+</sup> /CD122 <sup>+</sup>             | 0.02±0.0  | 0.03±0.0        |
| DX5 <sup>+</sup> /LGL <sup>+</sup>               | 0.02±0.0  | 0.01±0.0        |

Splenocytes from 7-8 week NOD-*Rag1*<sup>null</sup> *IL2rγ*<sup>null</sup> (NRG, n=4) and NOD-*Rag1*<sup>null</sup> *IL2rγ*<sup>null</sup> *Ins2*<sup>+Akita</sup> (NRG-Akita, n=4) mice were analyzed by flow cytometry for the indicated mouse cell surface markers. Data shown are the mean ± 1 s.d. No significant differences were observed.

**Supplemental Table 2. Human HSC Engraftment in the Blood of NRG and NRG-Akita Mice**

| BLOOD                           | NRG        | NRG-Akita   |
|---------------------------------|------------|-------------|
| <b>Percent Human Leukocytes</b> |            |             |
| CD45+                           | 15.2 ± 2.0 | 12.9 ± 2.5  |
| <b>B Lineage</b>                |            |             |
| CD20+                           | 53.4 ± 3.7 | 50.1 ± 6.6  |
| <b>Myeloid/Granulocytic</b>     |            |             |
| CD13+                           | 4.1 ± 1.8  | 2.1 ± 0.7   |
| CD33+                           | 5.4 ± 1.2  | 5.9 ± 1.6   |
| CD33+64+                        | 1.7 ± 0.8  | 0.7 ± 0.1   |
| CD64+                           | 0.5 ± 0.3  | 0.2 ± 0.4   |
| <b>T Lineage</b>                |            |             |
| CD3+                            | 23.0 ± 4.2 | 32.7 ± 7.5  |
| CD4+                            | 23.1 ± 2.9 | 27.79 ± 4.8 |
| CD8+                            | 8.1 ± 1.3  | 11.6 ± 2.7  |
| <b>Dendritic Subsets</b>        |            |             |
| BDCA2+                          | 0.7 ± 0.9  | 0.2 ± 0.03  |
| <b>Monocyte/Macrophage</b>      |            |             |
| CD14+                           | 6.2 ± 1.2  | 5.5 ± 1.2   |
| <b>NK Cell</b>                  |            |             |
| CD56+                           | 2.9 ± 0.7  | 2.4 ± 0.8   |

Newborn NRG (n=16) and NRG-Akita (n=12) mice were irradiated with 400 cGY and injected with T cell-depleted UCB containing 3x10<sup>4</sup> human CD34<sup>+</sup> HSC by intracardiac injection as described in Materials and Methods. The percent of various human cell populations in the blood was determined by flow cytometry 12 weeks later. The percentages shown for each lineage is of CD45<sup>+</sup> cells. No significant differences were observed.

**Supplemental Table 3. Human HSC Engraftment in the Bone Marrow of NRG and NRG-Akita Mice**

| <b>BONE MARROW</b>              | <b>NRG</b>  | <b>NRG-Akita</b> |
|---------------------------------|-------------|------------------|
| <b>Percent Human Leukocytes</b> |             |                  |
| CD45+                           | 44.0 ± 7.2  | 42.3 ± 7.8       |
| <b>B Lineage</b>                |             |                  |
| CD10+                           | 64.3 ± 4.6  | 61.2 ± 4.0       |
| CD10+20+                        | 11.1 ± 1.4  | 10.1 ± 2.0       |
| CD20+IgM+                       | 6.5 ± 0.9   | 5.9 ± 0.6        |
| <b>Myeloid/Granulocytic</b>     |             |                  |
| CD33+                           | 5.3 ± 0.8   | 7.0 ± 1.0        |
| CD33+64+                        | 8.6 ± 0.8   | 14.8 ± 2.0       |
| CD64+                           | 1.3 ± 0.5   | 0.9 ± 0.2        |
| <b>Hematopoietic Progenitor</b> |             |                  |
| CD34+38-                        | 0.05 ± 0.01 | 0.1 ± 0.1        |
| (Common ) CD34+38+              | 14.8 ± 1.5  | 14.0 ± 1.6       |
| <b>Erythroblast/RBC</b>         |             |                  |
| CD71+                           | 0.3 ± 0.1   | 0.4 ± 0.1        |
| CD71+235a+                      | 3.8 ± 2.1   | 7.1 ± 2.9        |
| CD235a+                         | 0.3 ± 0.1   | 0.3 ± 0.1        |
| <b>Dendritic Subsets</b>        |             |                  |
| (Monocytic) CD11c+BDCA2-        | 2.5 ± 0.3   | 3.6 ± 0.4        |
| (Plasmacytoid) CD123+BDCA2+     | 0.5 ± 0.1   | 0.4 ± 0.1        |
| <b>Monocyte/Macrophage</b>      |             |                  |
| CD14+                           | 6.0 ± 0.7   | 10.2 ± 1.2       |
| <b>NK Cell</b>                  |             |                  |
| CD56+                           | 0.7 ± 0.1   | 1.3 ± 0.4        |

Newborn NRG (n=16) and NRG-Akita (n=12) mice were irradiated with 400 cGy and injected with T cell-depleted UCB containing  $3 \times 10^4$  human CD34<sup>+</sup> HSC by intracardiac injection as described in Materials and Methods. The percent of various human cell populations in the bone marrow was determined by flow cytometry 12 weeks later. The percentages shown for each lineage is of CD45<sup>+</sup> cells, except for dendritic cells, which were identified in cells negative for murine CD45. No significant differences were observed.

**Supplemental Table 4. Human HSC Engraftment in the Thymus of NRG and NRG-Akita Mice**

| <b>THYMUS</b>                                                           | <b>NRG</b> | <b>NRG-Akita</b> |
|-------------------------------------------------------------------------|------------|------------------|
| <b>Percent Human Leukocytes</b>                                         |            |                  |
| CD45+                                                                   | 74.6 ± 6.4 | 77.4 ± 6.2       |
| <b>Developing T Subsets</b><br>(gated on human CD45 <sup>+</sup> cells) |            |                  |
| CD4-CD8-                                                                | 13.9 ± 5.2 | 10.1 ± 5.4       |
| CD4+CD8+                                                                | 56.1 ± 7.0 | 49.2 ± 10.1      |
| CD4+                                                                    | 18.9 ± 2.1 | 21.8 ± 4.9       |
| CD8+                                                                    | 11.1 ± 1.6 | 18.9 ± 4.9       |

Newborn NRG (n=16) and NRG-Akita (n=12) mice were irradiated with 400 cGy and injected with T cell-depleted UCB containing  $3 \times 10^4$  human CD34<sup>+</sup> HSC by intracardiac injection as described in Materials and Methods. The percent of various human cell populations in the thymus was determined by flow cytometry 12 weeks later. No significant differences were observed.

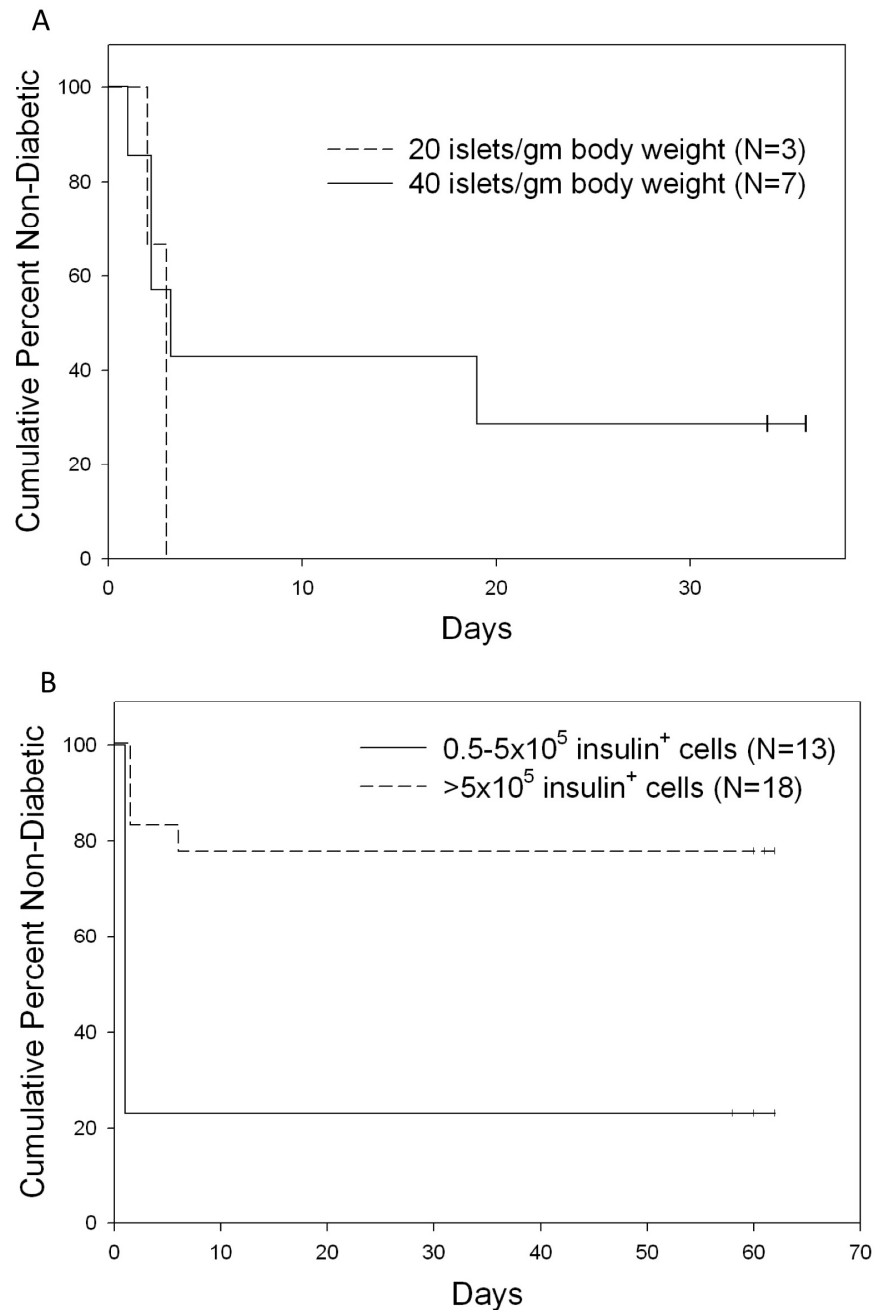

**Supplemental Figure 1. Transplantation of Mouse Islets and Dissociated Mouse Islet cells into Chemically-diabetic NSG Mice.** **Panel A:** Islets from BALB/c mice were isolated and transplanted intra-pancreatically at 20 or 40 islets/gm of body weight, as described in Materials and Methods. The graph shows the frequency of diabetes in recipients. No significant differences were observed. **Panel B:** Islets from BALB/c mice were dissociated and single cell suspensions of 0.5 to 5x10<sup>5</sup> insulin<sup>+</sup> cells or greater 5x10<sup>5</sup> insulin<sup>+</sup> cells were transplanted into the renal subcapsular space. The graph shows the frequency of diabetes in recipients. 0.5 to 5x10<sup>5</sup> insulin<sup>+</sup> cells versus greater 5x10<sup>5</sup> insulin<sup>+</sup> cells, p=0.02. Small vertical bars indicate censored data, i.e., mice that were found dead or were removed from the study for other analyses.

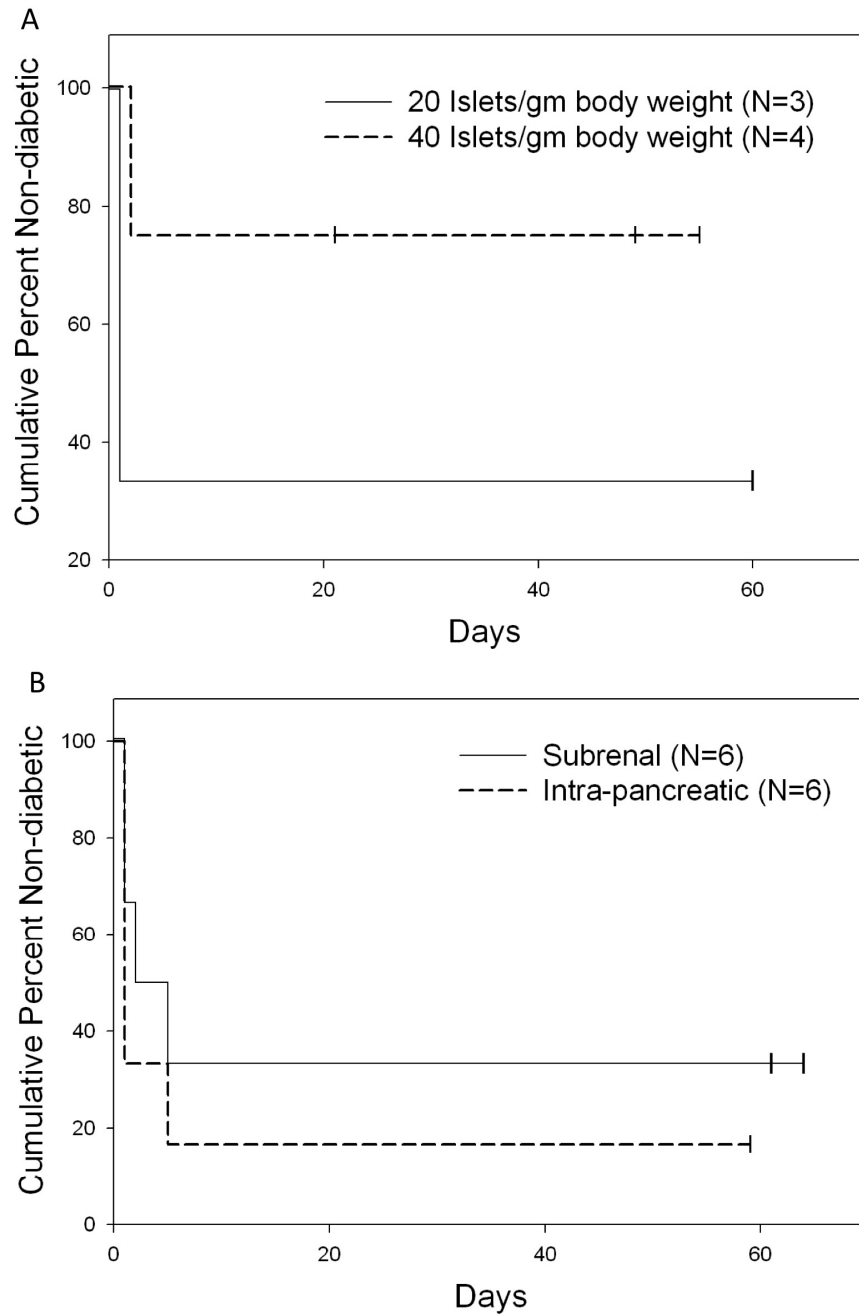

**Supplemental Figure 2. Transplantation of Mouse Islets and Dissociated Mouse Islet Cells into Diabetic NRG-Akita mice. Panel A:** Islets from BALB/c mice were transplanted intra-pancreatically at 20 or 40 islets/gm of body weight into diabetic NRG-Akita mice. The graph shows the frequency of diabetes in recipients. No significant differences were observed. **Panel B:** Islets from BALB/c mice were dissociated and single cells containing  $1-4 \times 10^6$  insulin-positive cells were transplanted intra-pancreatically or subrenally into diabetic NRG-Akita mice. The graph shows the frequency of diabetes in recipients. No significant differences were observed. Small vertical bars indicate censored data, i.e., mice that were found dead or were removed from the study for other analyses.
